# Supplementary material for: Genome-Wide Mapping of Bivalent Histone Modifications in Hepatic Stem/Progenitor Cells
Source: Hindawi journal article supplement (doi:10.1155/2019/9789240), 2019-04-01

## Supplementary Figure Legends

**Supplementary Figure S1** Purification of hepatic stem/progenitor cells. Representative flow cytometric profiles of MACS-sorted Dlk<sup>+</sup> cells. The percentages of Dlk<sup>+</sup> cells are indicated as mean values for three independent analyses.

**Supplementary Figure S2** Histone modification status at the *Ink4a/Arf* loci in purified Dlk<sup>+</sup> and terminally differentiated cells.

(a) The signal map of H3K4me3 and H3K27me3 at the *Ink4a/Arf* locus in Dlk<sup>+</sup> cells. (b) Real-time RT-PCR analysis of *Ink4a/Arf* in Dlk<sup>+</sup> cells and cells differentiated toward hepatocyte lineage and cholangiocyte lineages. \*Statistically significant ( $p < 0.05$ ). (c) Quantitative ChIP analyses on the *Ink4a/Arf* loci and *Actb* control promoter region using anti-H3K4me3 and anti-H3K27me3 antibodies. Percentages of input DNA are shown as mean values for independent triplicate analyses.

**Supplementary Figure S3** Effects of *Sox4*-knockdown on the differentiation of hepatic stem/progenitor cells.

(a) Real-time RT-PCR analyses of hepatocytic differentiation and maturation marker genes and stem cell marker genes in EHS gel culture for hepatocytic differentiation. \*Statistically significant ( $p < 0.05$ ). (b) Real-time RT-PCR analyses of cholangiocytic differentiation and maturation marker genes and stem cell marker genes in collagen gel culture for cholangiocytic differentiation. \*Statistically significant ( $p < 0.05$ ).

Supplementary Table S1 Primer sequences for Quantitative RT-PCR

| Gene name                      | Forward primer (5'-3') | Reverse primer (5'-3')    |
|--------------------------------|------------------------|---------------------------|
| <i>p16<sup>Ink4a</sup></i>     | AATCTCCGCGAGGAAAGC     | GTCTGTCTGCAGCGGACTC       |
| <i>p19<sup>Arf</sup></i>       | GGGTTTTCTTGGTGAAGTTCG  | TTGCCCATCATCATCACCT       |
| <i>Hnf1<math>\beta</math></i>  | CTACGACCGGCAAAAGAATC   | CCCCTCGTTGCAAACATT        |
| <i>Hnf3<math>\beta</math></i>  | CAACCACCCCTTCTCTATCAA  | CCTTGAGGTCCATTTTGTGG      |
| <i>Hnf4<math>\alpha</math></i> | GCGGAGGTCAAGCTACGA     | ATCCCAGAGATGGGAGAGGT      |
| <i>Hnf6</i>                    | AGACCTTCCGGAGGATGTG    | TTGCTCTTTCCGTTTGCAG       |
| <i>Alb</i>                     | TGGAATGCGCAGATGACA     | GTGGTTTATCGCAGCAAGTCT     |
| <i>CK7</i>                     | CATTGAGATCGCCACCTACC   | ACAGGTCCCATTCCGTCTC       |
| <i>Itgb4</i>                   | GAGGATTCATCCAACATCGTG  | CGGATGTCCAGGTTGGAG        |
| <i>Tat</i>                     | CGGAGCAGTCTGTCCACTG    | GAACTCCTGGATCCGGCTA       |
| <i>Sox4</i>                    | CTCGCTCTCCTCGTCCTCT    | CGTCTTCGAACTCGTCGTC       |
| <i>Sox9</i>                    | GTACCCGCATCTGCACAAC    | CTCCTCCACGAAGGGTCTCT      |
| <i>Afp</i>                     | TGGATGTCAGGACAATCTGG   | GCAGCTTTGCTTGGACAGT       |
| <i>Epcam</i>                   | CAGCAAAATATGAGAAGGCTGA | CCAGGTTTATACATCTGCAGTCC   |
| <i>Bmi1</i>                    | AAACCAGACCACTCCTGAACA  | TCTTCTTCTCTTCATCTCATTTTTG |
| <i>Hprt</i>                    | TCCTCCTCAGACCGCTTTT    | CCTGGTTCATCATCGCTAATC     |

Supplementary Table S2 Primer sequences designed for ChIP quantitative PCR

| Region             | Sequence |                                      |
|--------------------|----------|--------------------------------------|
| <i>Sox4-1</i>      | Fw       | 5'- TTTGCCTCTGTGTGTGTGTG -3'         |
|                    | Rv       | 5'- CCTCCAAGCCCCTTGTTATC -3'         |
| <i>Sox4-2</i>      | Fw       | 5'- AATTGCACCAACTCCTCAGC -3'         |
|                    | Rv       | 5'- TCGATTGCAGTTCACGAGAG -3'         |
| <i>Sox4-3</i>      | Fw       | 5'- ACAGCGACAAGATTCCGTTC -3'         |
|                    | Rv       | 5'- GCCCGACTTCACCTTCTTTC -3'         |
| <i>Sox4-4</i>      | Fw       | 5'- CTCTCCTCGTCCTCTTCCTC -3'         |
|                    | Rv       | 5'- CAAAGTTTGAGCTGGGGTTC -3'         |
| <i>Ink4a/Arf-1</i> | Fw       | 5'- CTTAGAGTTACAGAAAGGGCTGGA -3'     |
|                    | Rv       | 5'- GAATTTCAAGGAAGTGCTACCCTA -3'     |
| <i>Ink4a/Arf-2</i> | Fw       | 5'- CACTGCACTGGAAGAGGACA -3'         |
|                    | Rv       | 5'- CTGAAGGTCCTGGGTTCAAA -3'         |
| <i>Ink4a/Arf-3</i> | Fw       | 5'- GATGGAGCCCGGACTACAGAAG -3'       |
|                    | Rv       | 5'- CTGTTTCAACGCCAGCTCTC -3'         |
| <i>Ink4a/Arf-4</i> | Fw       | 5'- AGGGAATACACTGTAAGCCTGTGT -3'     |
|                    | Rv       | 5'- TTAAGTACTCGGATCAGACATCCA -3'     |
| <i>Actb</i>        | Fw       | 5'- CCCAACACACCTAGCAAATTAGAACCAC -3' |
|                    | Rv       | 5'- CCTGGATTGAATGGACAGAGAGTCACT -3'  |

Supplementary Table 3 List of bivalent genes showing upregulation after differentiation induction

| RefSeq   | Definition                                                           |
|----------|----------------------------------------------------------------------|
| Adcy1    | adenylate cyclase 1                                                  |
| Ap1s2    | AP-1 complex subunit sigma-2                                         |
| Ap3m2    | adaptor related protein complex 3 mu 2 subunit                       |
| Bmper    | BMP binding endothelial regulator                                    |
| Cbr3     | carbonyl reductase 3                                                 |
| Ccdc92   | coiled-coil domain containing 92                                     |
| Cdkn2a   | Cyclin dependent kinase inhibitor 2A                                 |
| Cdr2l    | Cerebellar degeneration related protein 2 like                       |
| Celsr1   | Cadherin EGF LAG seven-pass G-type receptor 1                        |
| Crim1    | Cysteine rich transmembrane BMP regulator 1                          |
| Cyb561   | Cytochrome b561                                                      |
| Dlgap4   | DLG associated protein 4                                             |
| Enah     | ENAH, actin regulator                                                |
| Eomes    | Eomesodermin                                                         |
| Eps8     | Epidermal growth factor receptor pathway substrate 8                 |
| Fam171b  | Family with sequence similarity 171 member B                         |
| Fam189a2 | Family with sequence similarity 189 member A2                        |
| Fam84a   | Family with sequence similarity 84 member A                          |
| Fbxo2    | F-box protein 2                                                      |
| Fibcd1   | Fibrinogen C domain containing 1                                     |
| Flnc     | Filamin C                                                            |
| Fzd9     | Frizzled class receptor 9                                            |
| Gabbr1   | Gamma-aminobutyric acid type B receptor subunit 1                    |
| Galnt12  | Polypeptide N-acetylgalactosaminyltransferase 12                     |
| Grasp    | General receptor for phosphoinositides 1 associated scaffold protein |
| Hap1     | Huntingtin associated protein 1                                      |
| Hs3st6   | Heparan sulfate-glucosamine 3-sulfotransferase 6                     |
| Htra1    | HtrA serine peptidase 1                                              |
| Insm1    | INSM transcriptional repressor 1                                     |
| Irx3     | Iroquois homeobox 3                                                  |
| Kcnj4    | Potassium voltage-gated channel subfamily J member 4                 |
| Kcns3    | Potassium voltage-gated channel modifier subfamily S member 3        |
| Kif5c    | Kinesin family member 5C                                             |
| Klf5     | Kruppel like factor 5                                                |
| Loxl1    | Lysyl oxidase like 1                                                 |
| Mal      | Mal, T cell differentiation protein                                  |

Supplementary Table 3 Continued

| RefSeq        | Definition                                                           |
|---------------|----------------------------------------------------------------------|
| Mapk12        | Mitogen-activated protein kinase 12                                  |
| Mfsd2a        | Major facilitator superfamily domain containing 2A                   |
| Myo5a         | Myosin VA                                                            |
| Mypop         | Myb related transcription factor, partner of profilin                |
| Pfklp         | Phosphofructokinase, platelet                                        |
| Pmp22         | Peripheral myelin protein 22                                         |
| Podxl         | Podocalyxin like                                                     |
| Ppm1j         | Protein phosphatase, Mg <sup>2+</sup> /Mn <sup>2+</sup> dependent 1J |
| Prkg2         | Protein kinase, cGMP-dependent, type II                              |
| Rgl3          | Ral guanine nucleotide dissociation stimulator like 3                |
| Rhpn1         | Rhopilin Rho GTPase binding protein 1                                |
| Rnf113a1      | Ring finger protein 113A1                                            |
| S100a10       | S100 calcium binding protein A10                                     |
| Scn1b         | Sodium voltage-gated channel beta subunit 1                          |
| Sema7a        | Semaphorin 7A                                                        |
| Sfn           | Stratifin                                                            |
| Sh2d5         | SH2 domain containing 5                                              |
| Shc2          | SHC adaptor protein 2                                                |
| Slc41a2       | Solute carrier family 41 member 2                                    |
| Sox4          | SRY-box 4                                                            |
| Sox11         | SRY-box 11                                                           |
| Sp8           | Sp8 transcription factor                                             |
| Suv39h2       | Suppressor of variegation 3-9 homolog 2                              |
| Thbd          | Thrombomodulin                                                       |
| Tmsb10        | Thymosin beta 10                                                     |
| Tnfrsf10b     | TNF receptor superfamily member 10b                                  |
| Tpbp          | Trophoblast glycoprotein                                             |
| Tspan2        | Tetraspanin 2                                                        |
| Ttc9          | Tetratricopeptide repeat domain 9                                    |
| Vgf           | VGF nerve growth factor inducible                                    |
| Wnt9a         | Wnt family member 9A                                                 |
| Wt1           | Wilms tumor 1                                                        |
| Zfp462        | Zinc finger protein 462                                              |
| 3110043O21Rik |                                                                      |
| 4930506M07Rik |                                                                      |
| E130012A19Rik |                                                                      |



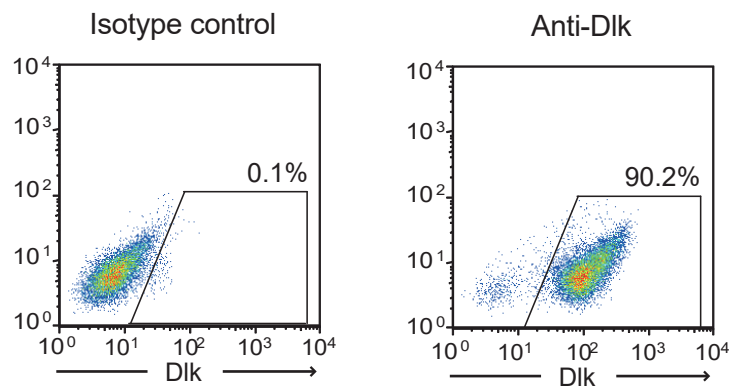

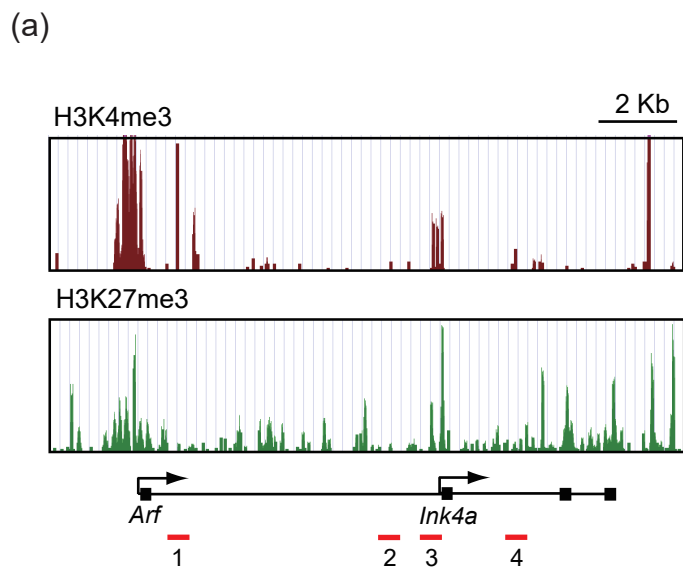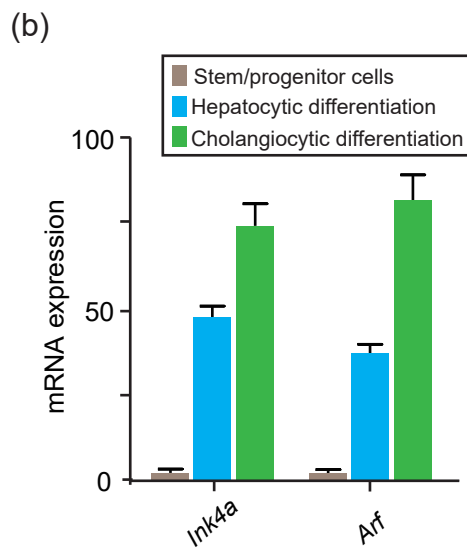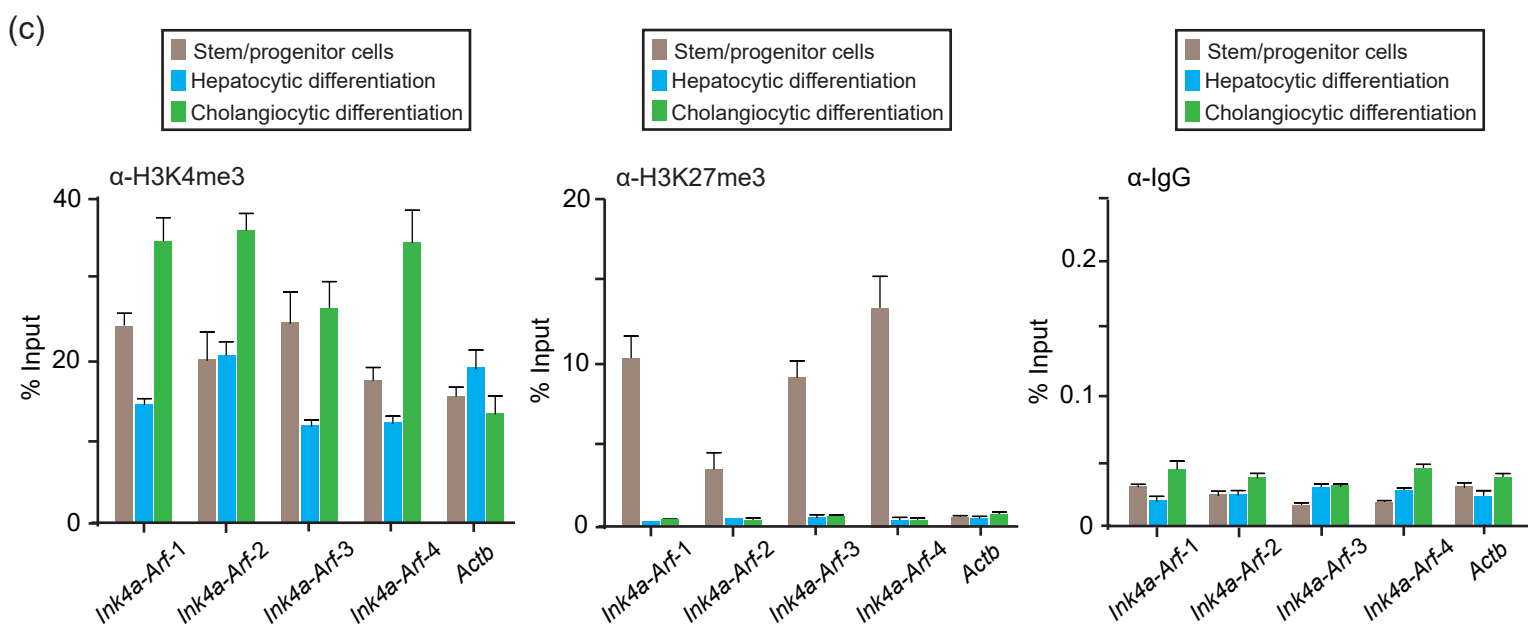



(a)

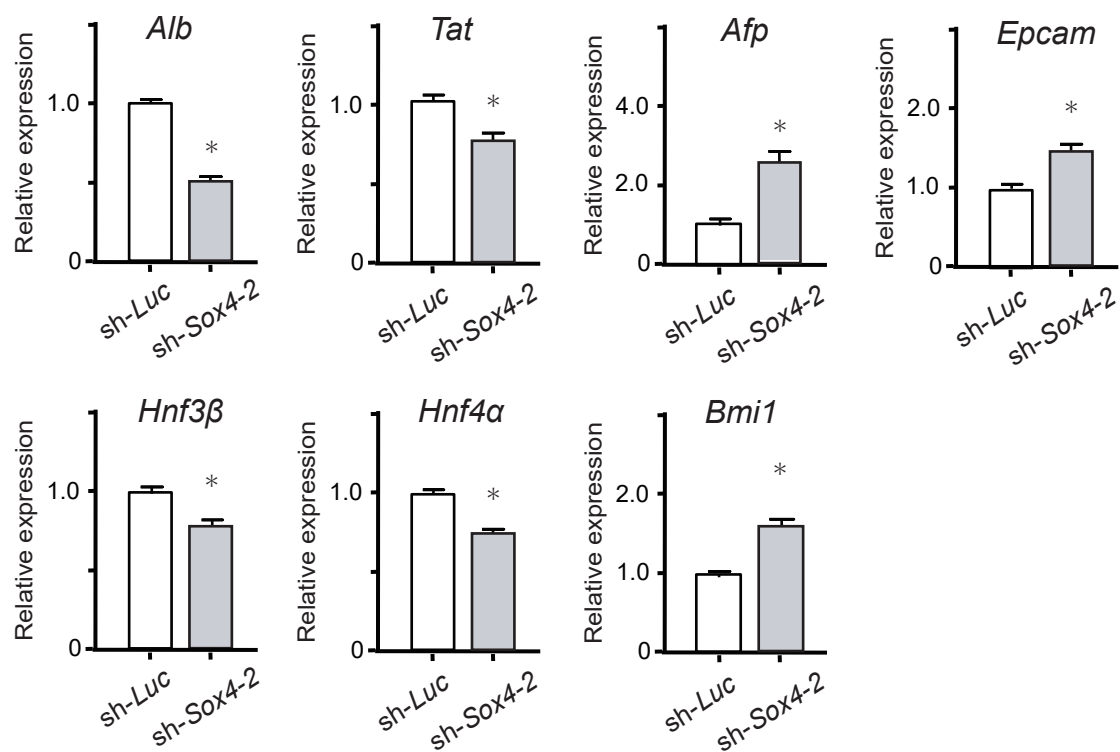

(b)

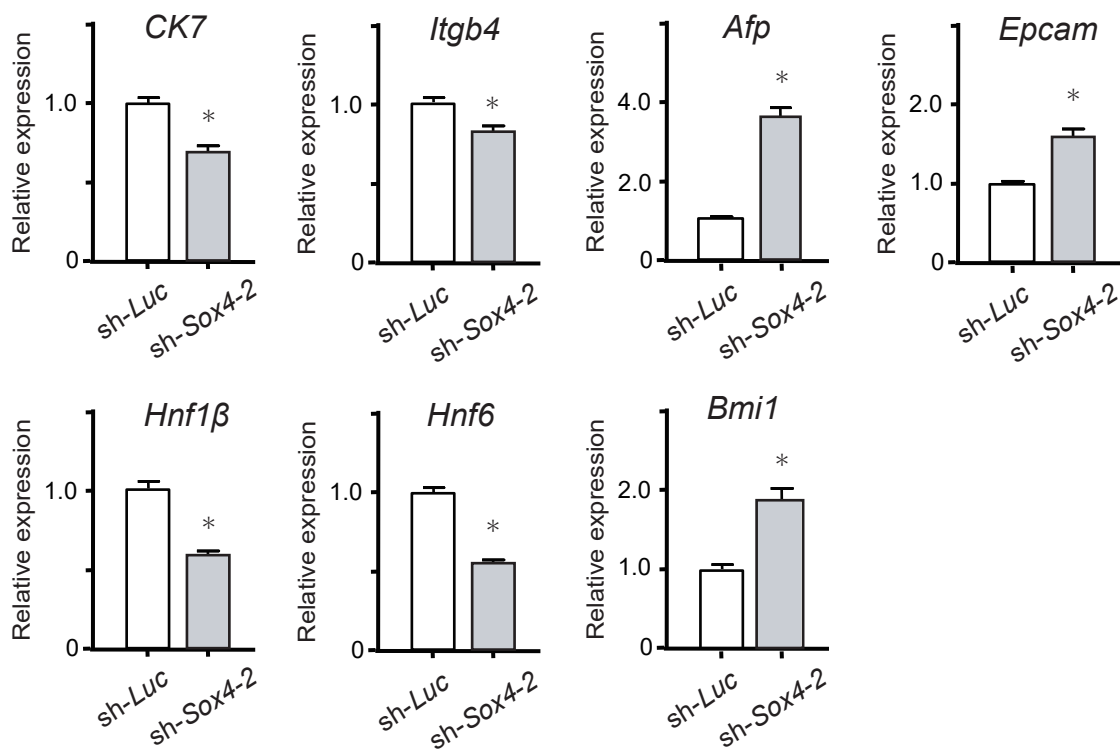

Supplement: f1 [file 9789240.f1.pdf]
